# Supplementary material
Source: MDPI journal article supplement (https://www.mdpi.com/2071-1050/14/15/9167)

Supplementary Materials

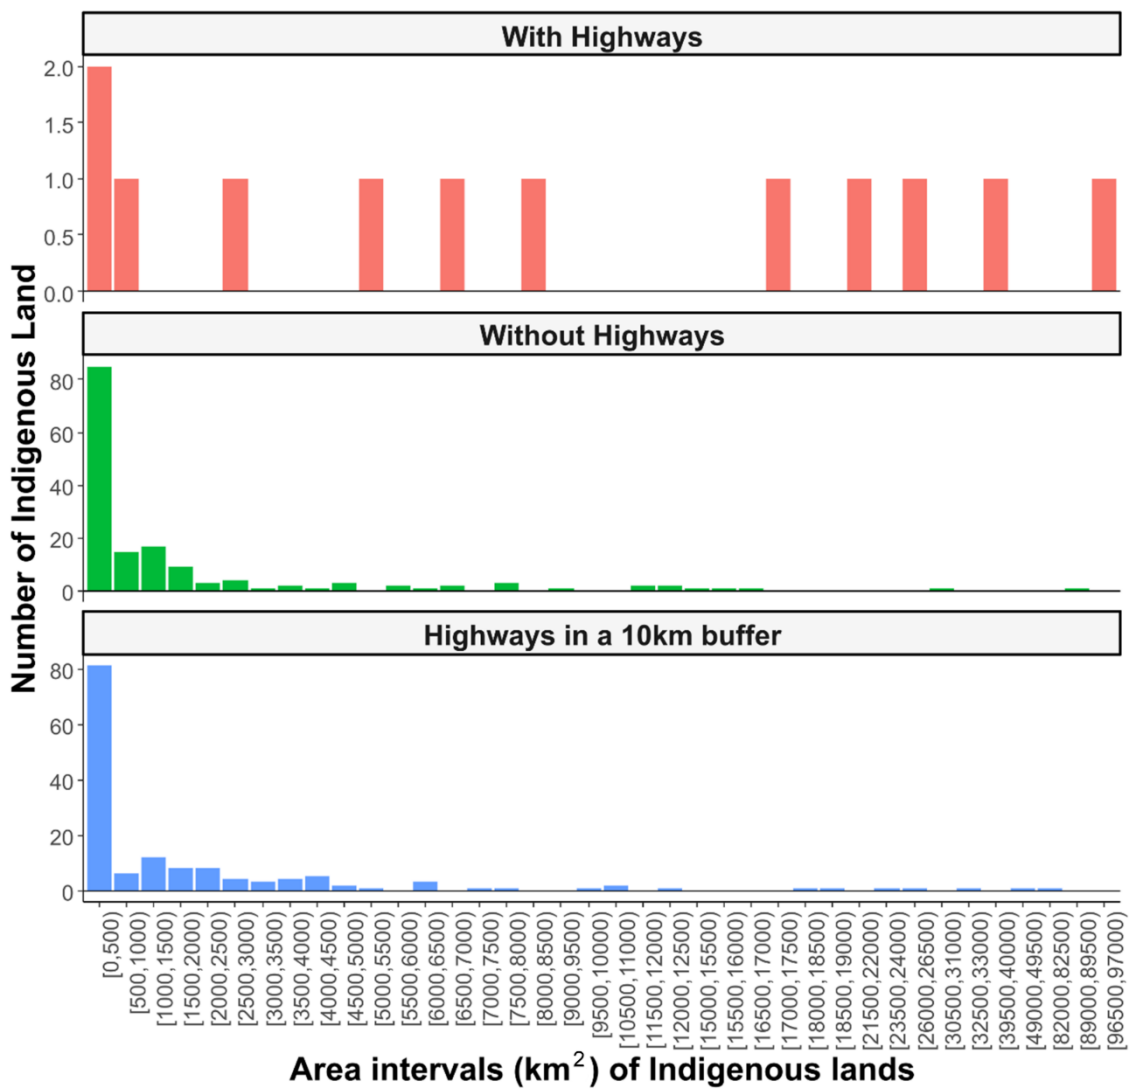

Figure S1. Number of Indigenous Lands (IL) by IL area intervals (km²).

Supplement: s1 [file s1]
